# Supplementary material for: Stage-specific IFN-induced and IFN gene expression reveal convergence of type I and type II IFN and highlight their role in both acute and chronic stage of pathogenic SIV infection
Source: PubMed Central journal article supplement (PMC5764266; doi:10.1371/journal.pone.0190334), 2018-01-11
Supplement: pone.0190334.s001.pdf [file pone.0190334.s001.pdf]

**A**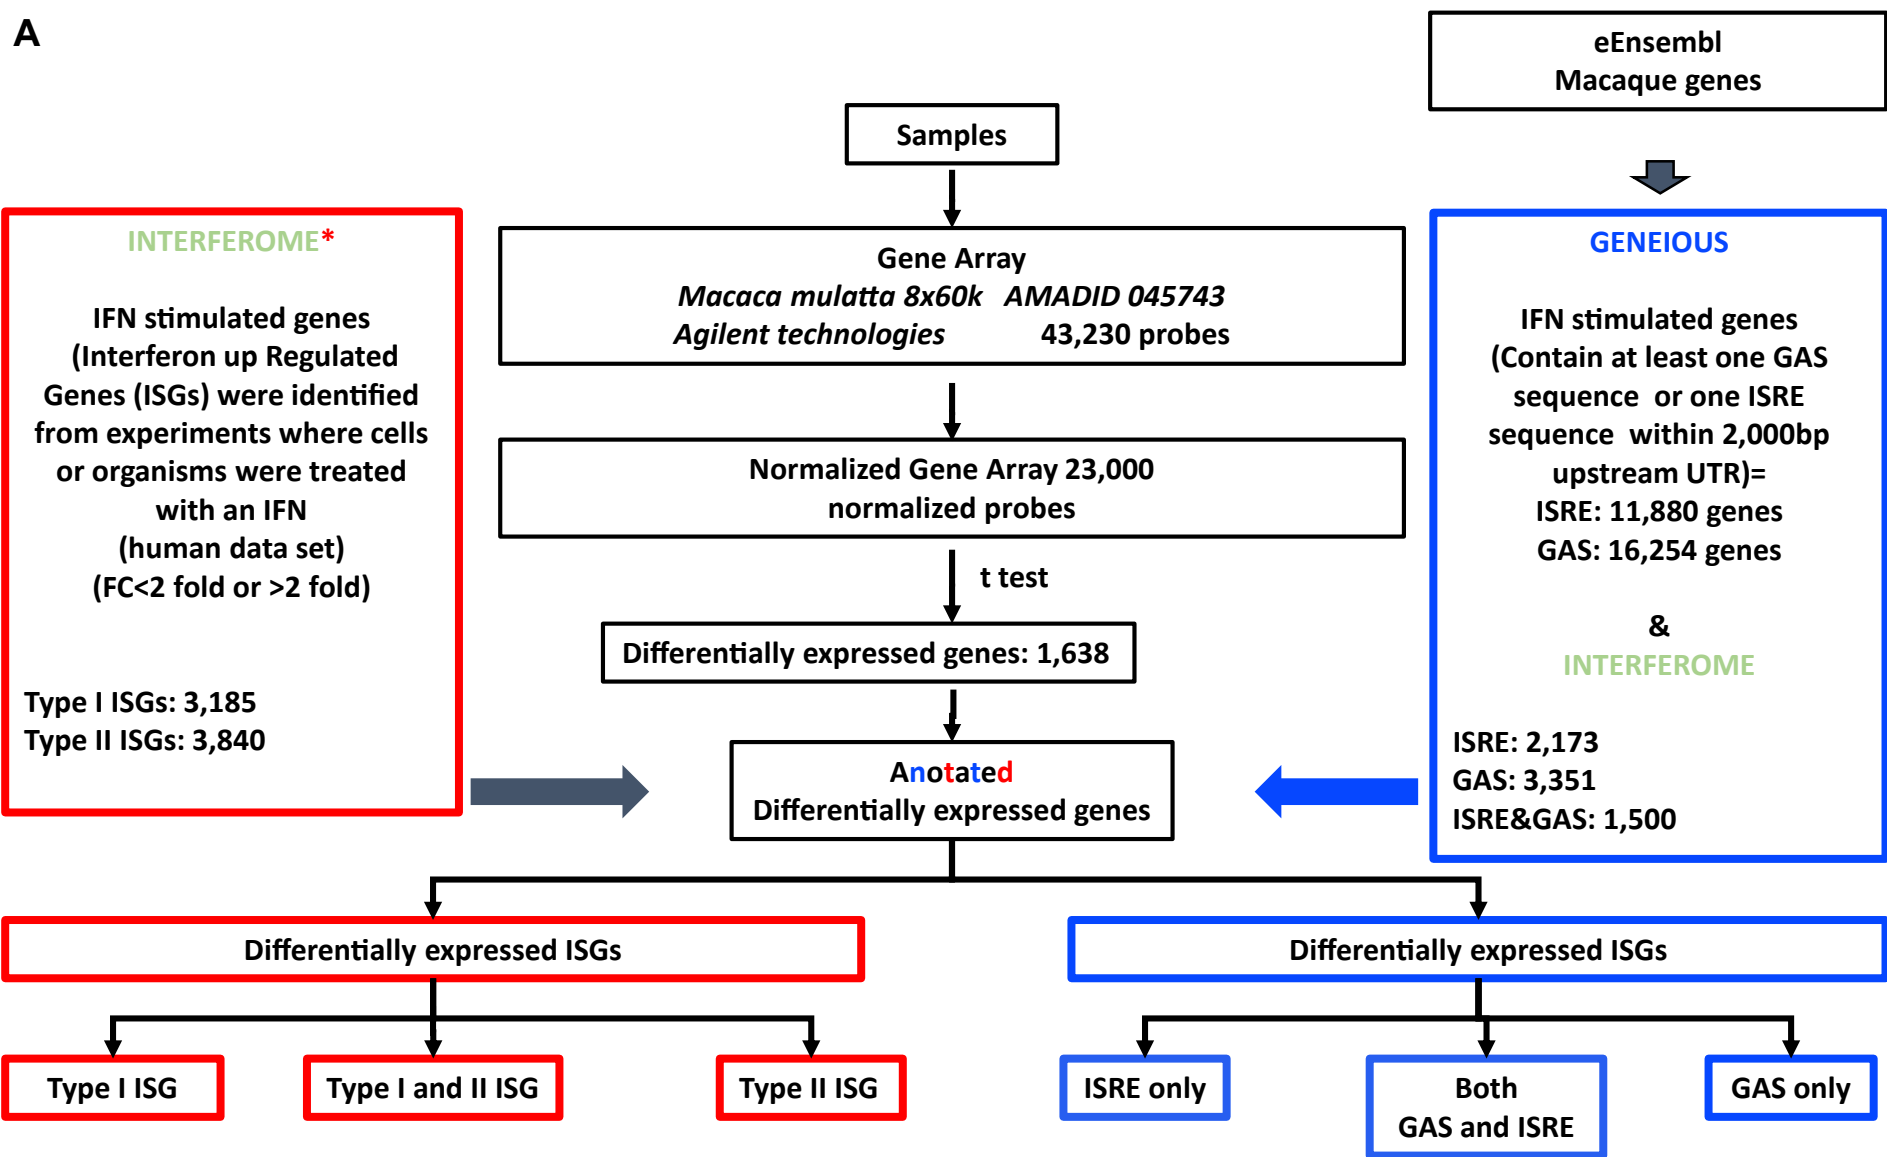**B**

ISRE-1 AAAnnGAAAC  
ISRE-2 AAAnnGAATG  
ISRE-3 GAAnnGAAAC  
ISRE-4 GAAnnGAAAG

GAS-1 TTCCnnnAAA  
GAS-2 TTACnnnAAA  
GAS-3 TTCCnnnAAG  
GAS-4 TTACnnnAAG

**Supplementary Figure 1: ISG annotations.** Differentially expressed interferon-induced genes were annotated using two approaches: the Interferome database helped to identify and classify genes depending on their induction by either type I IFN ( $\alpha$ ,  $\beta$ ), type II IFN ( $\gamma$ ), or both IFN types. In addition, Geneious software was used to annotate ISGs depending on the presence of either GAS, ISRE, or both sequence motifs within the 2,000 bp upstream of the 5'UTR of each gene. **(A)** Schematic diagram of annotations. **(B)** ISRE and GAS sequences.
