# Supplementary material for: Stage-specific IFN-induced and IFN gene expression reveal convergence of type I and type II IFN and highlight their role in both acute and chronic stage of pathogenic SIV infection
Source: PubMed Central journal article supplement (PMC5764266; doi:10.1371/journal.pone.0190334), 2018-01-11
Supplement: pone.0190334.s002.pdf [file pone.0190334.s002.pdf]

# Supplementary Figure 2

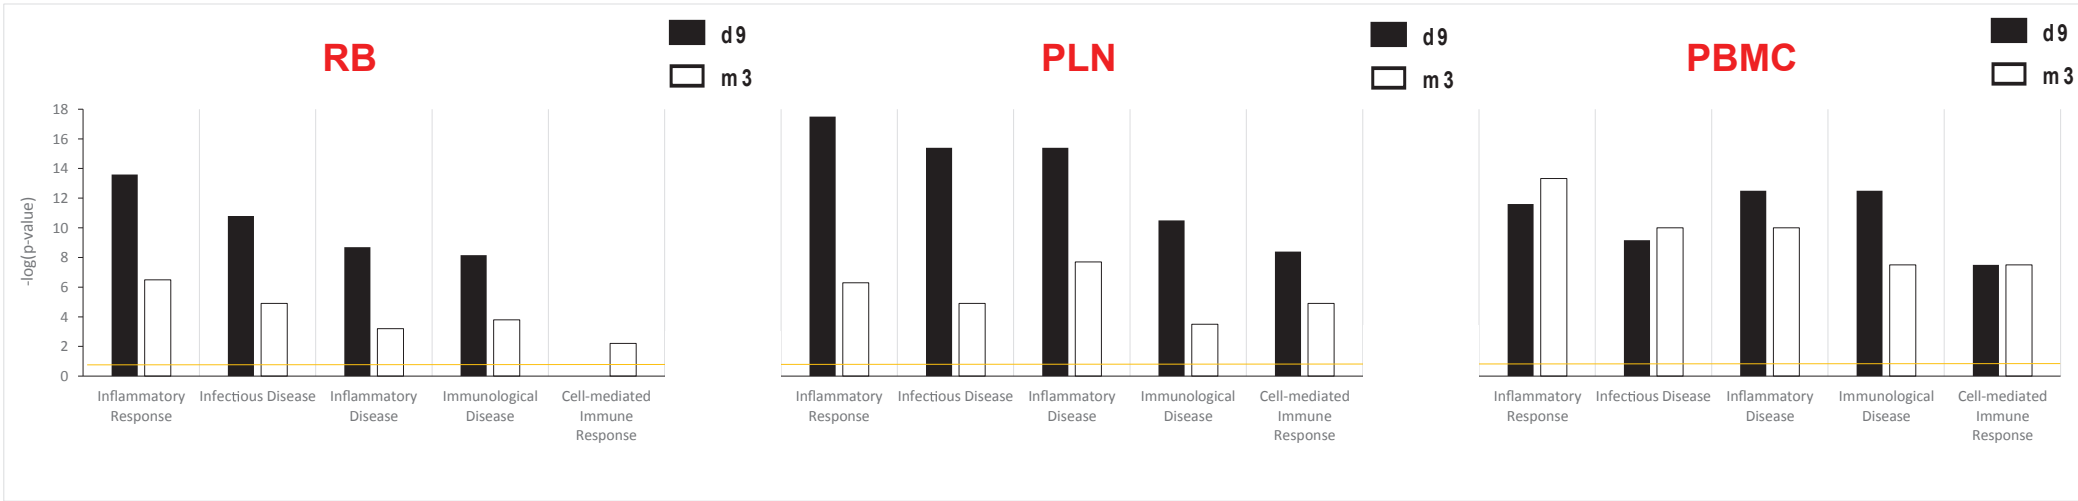

**Supplementary Figure 2: Functional enrichment of differentially expressed genes.** IPA enrichment analysis was performed on all differentially expressed genes (non-parametric t-test  $p < 0.05$ ) independently of their FC. The  $-\log(p\text{-values})$  of most significant functions are plotted in a histogram format for both D9 p.i. and M3 p.i., in each tissue including RBs, PLNs, and PBMCs.
