# Supplementary material for: Stage-specific IFN-induced and IFN gene expression reveal convergence of type I and type II IFN and highlight their role in both acute and chronic stage of pathogenic SIV infection
Source: PubMed Central journal article supplement (PMC5764266; doi:10.1371/journal.pone.0190334), 2018-01-11
Supplement: pone.0190334.s003.pdf [file pone.0190334.s003.pdf]

# Supplementary Figure 3

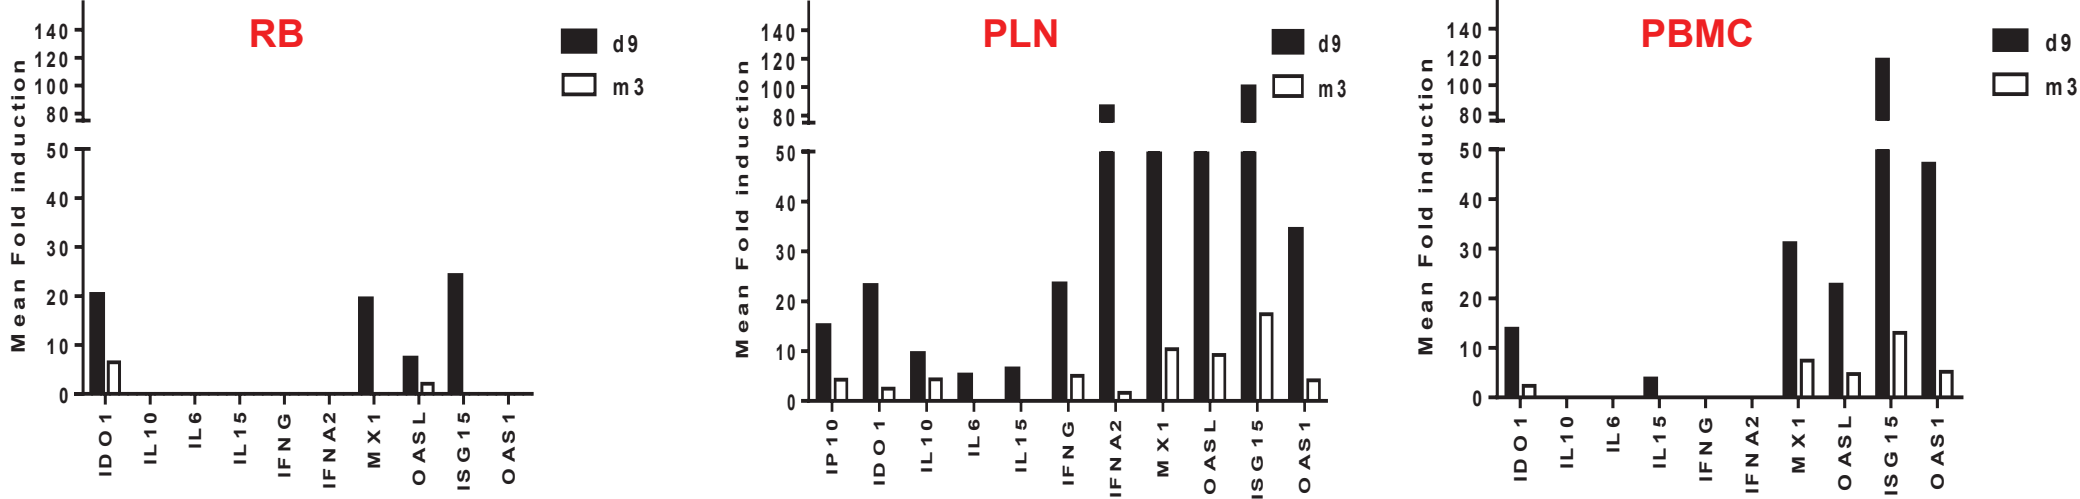

**Supplementary Figure 3: Comparison of the extent of IFNs and selected ISG expression in both phases of infection in RM, PLNs, and PBMCs.** The mean FC induction shows that both IFNs and ISGs were more consistently induced in PLNs than in PBMCs or RM.
