# Supplementary material for: Stage-specific IFN-induced and IFN gene expression reveal convergence of type I and type II IFN and highlight their role in both acute and chronic stage of pathogenic SIV infection
Source: PubMed Central journal article supplement (PMC5764266; doi:10.1371/journal.pone.0190334), 2018-01-11
Supplement: pone.0190334.s004.pdf [file pone.0190334.s004.pdf]

# Supplementary Figure 4

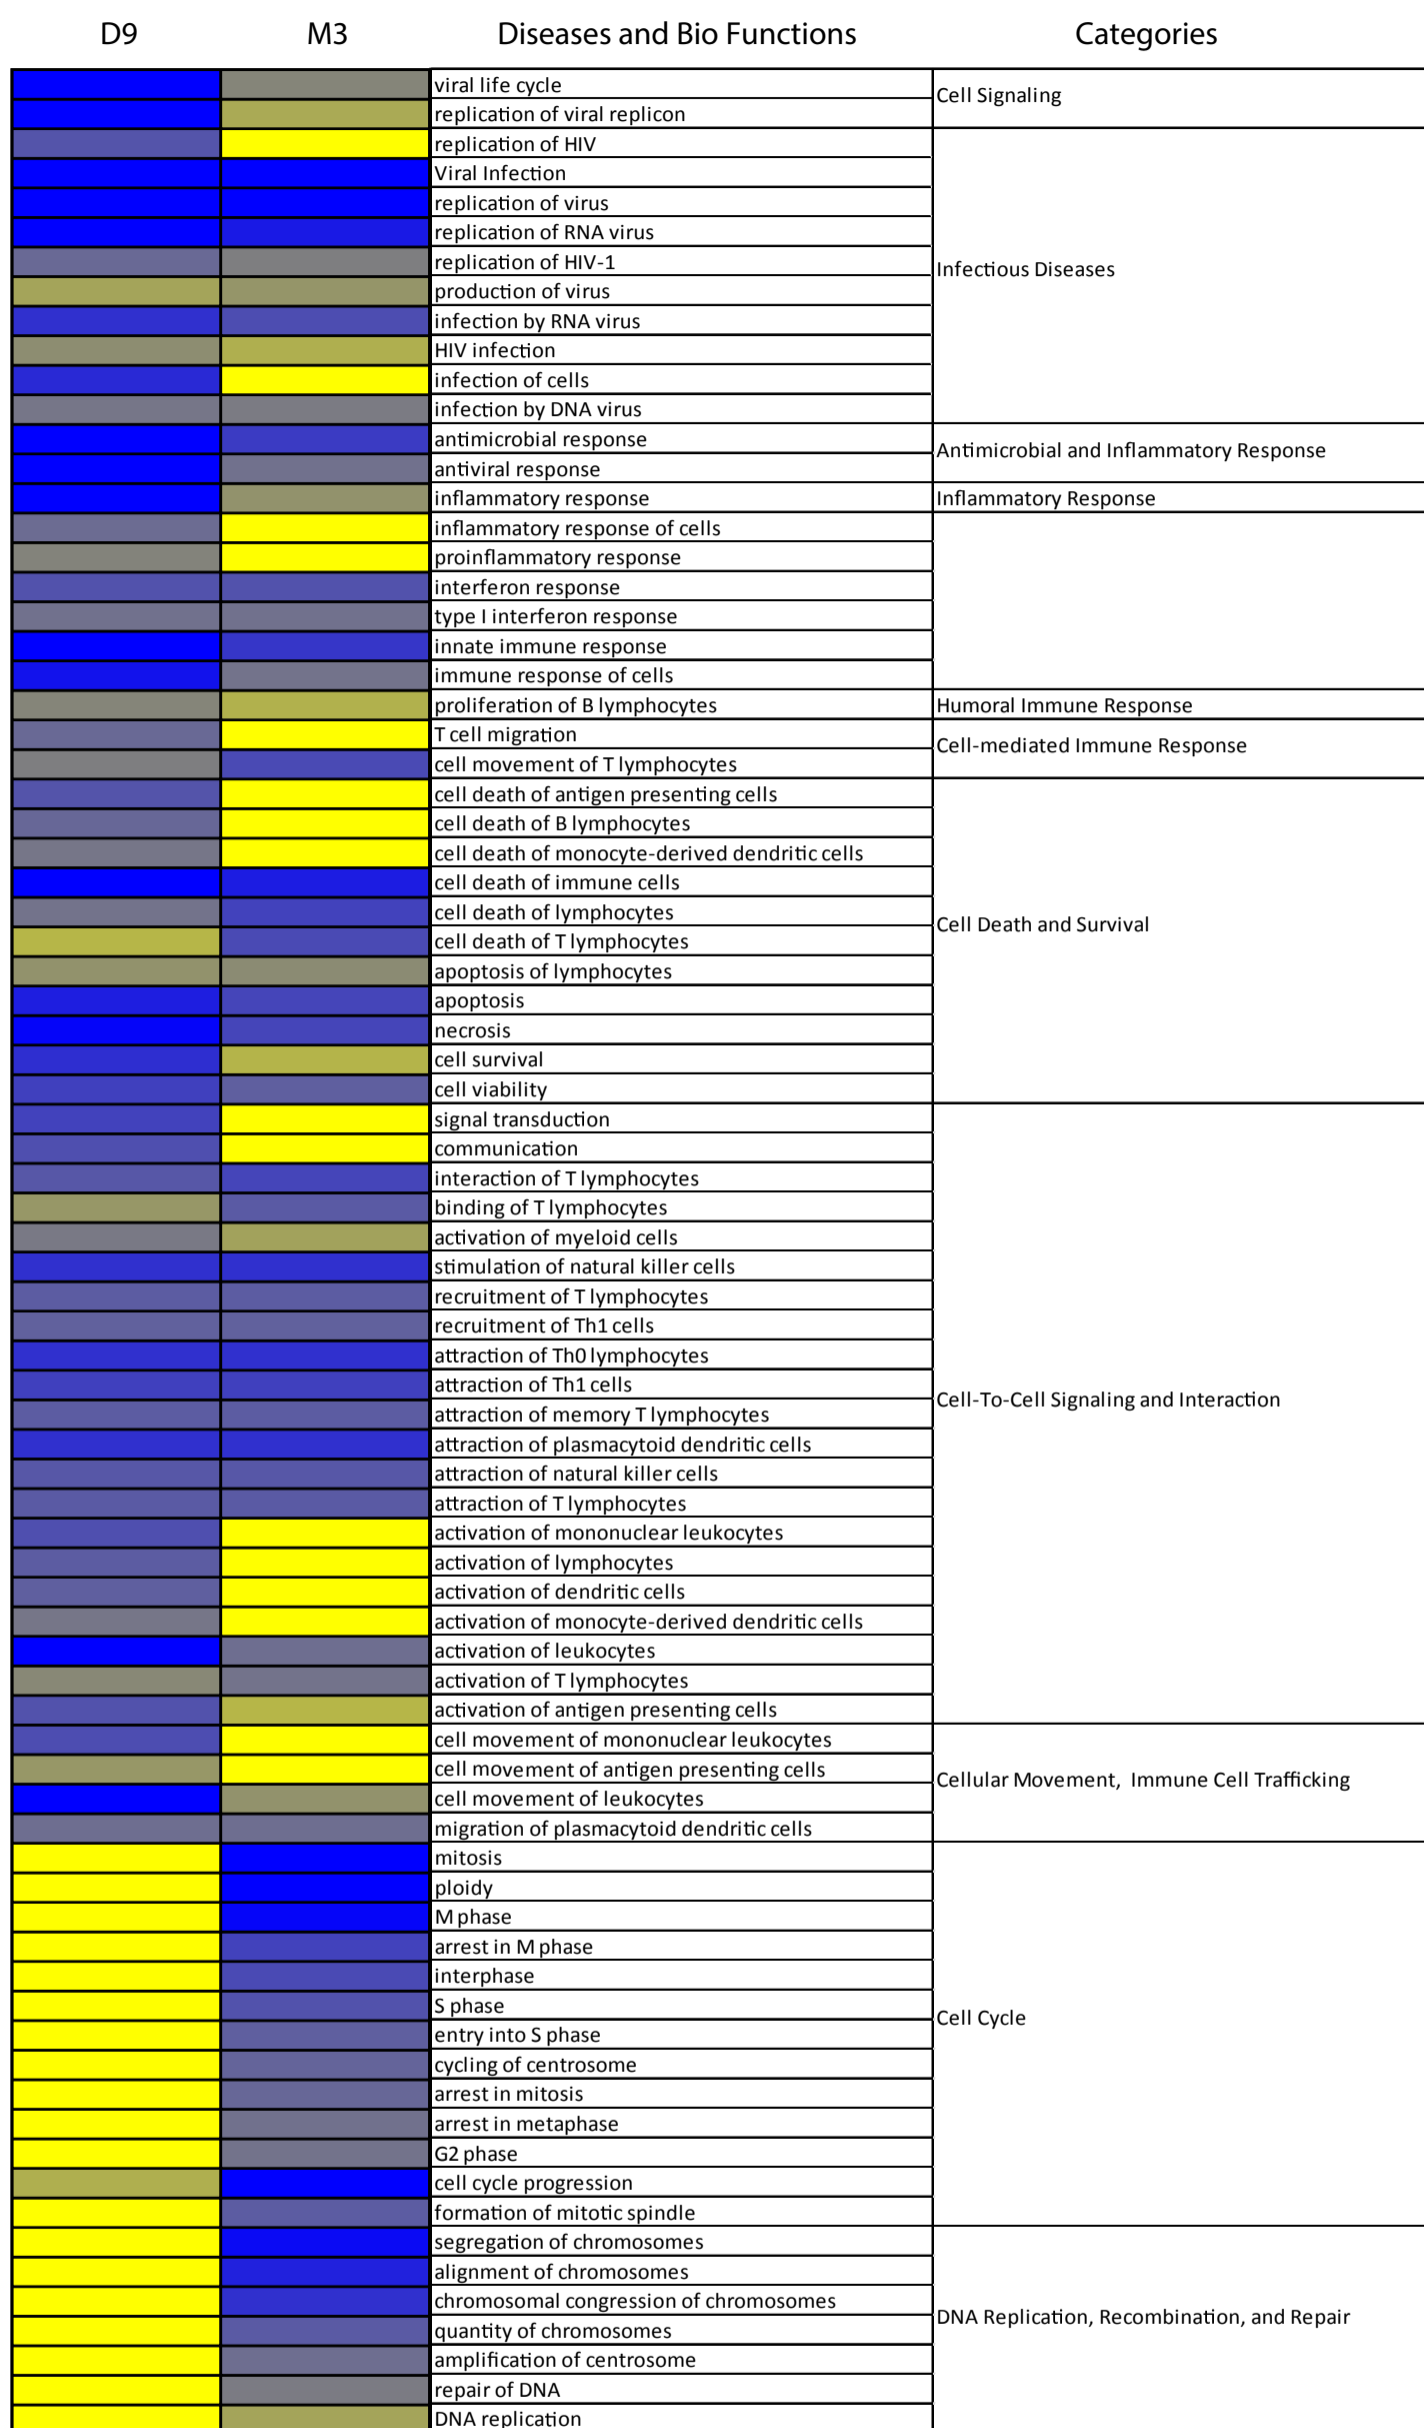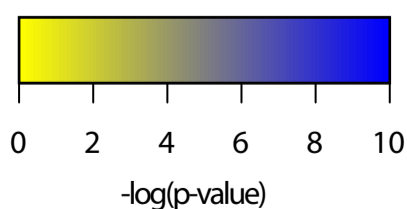

**Supplementary Figure 4: The main IPA functions associated with D9-ISGs and M3-ISGs.** IPA enrichment analysis was performed on all ISGs. The  $-\log(p\text{-values})$  of globally significant functions are plotted in heatmap format for both D9 and M3 p.i.
