# Supplementary material for: Stage-specific IFN-induced and IFN gene expression reveal convergence of type I and type II IFN and highlight their role in both acute and chronic stage of pathogenic SIV infection
Source: PubMed Central journal article supplement (PMC5764266; doi:10.1371/journal.pone.0190334), 2018-01-11
Supplement: pone.0190334.s005.pdf [file pone.0190334.s005.pdf]

# Supplementary Figure 5

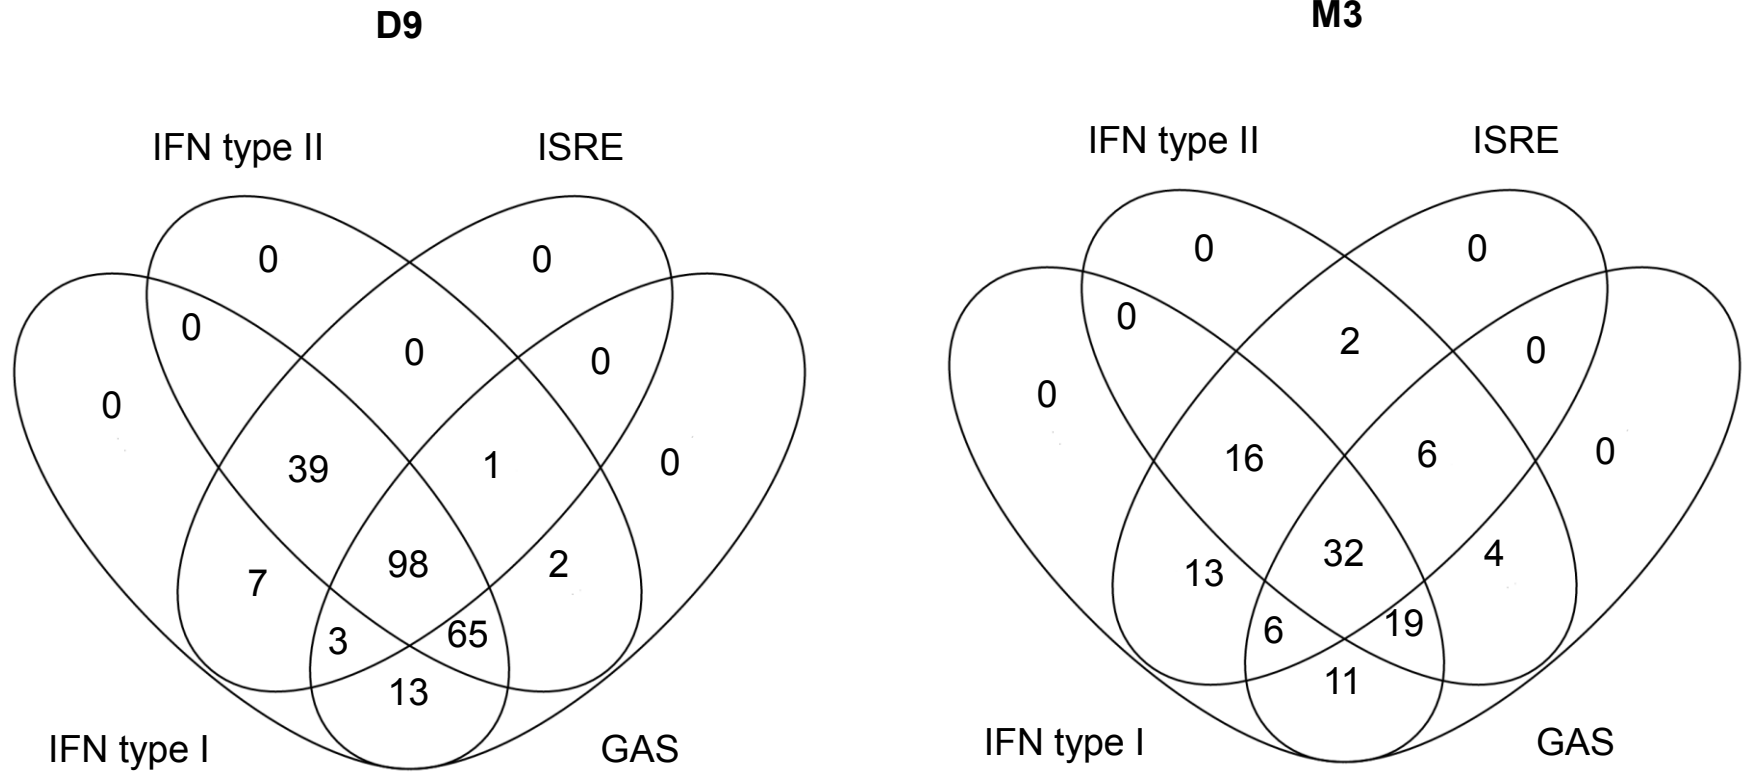

**Supplementary Figure 5: Overlap between Interferome annotation and GAS/ISRE annotation of differentially induced ISGs.** Venn diagram of differentially expressed ISGs, showing the number of genes in each annotation subset for D9 or M3 p.i.
